# Supplementary material
Source: Springer Nature journal article supplement (https://www.springermedizin.de/resource/supplementary/12883_2014_1028_MOESM3_ESM.pdf/9456374)
Supplement: MOESM3 [file 9456374]

Identification

Records identified through  
database searching  
(n = 3133)

Additional records identified  
through other sources  
(n = 0)

Screening

Records after duplicates removed  
(n = 1114)

Records screened  
(n = 1114)

Records excluded  
(n = 1044)

Eligibility

Full-text articles assessed  
for eligibility  
(n = 70)

Records excluded!  
(n = 52)  
*Non-empirical Study Design (n=12)*  
*MS was not reported separately (n=7)*  
*Dissertation (n=8)*  
*Lack of prespecified outcomes (n=24)*  
*Population outside age range (n=1)*

Full-text articles assessed  
for eligibility  
(n = 18)

Included

Studies included in the  
systematic review  
(n = 18)
